# Supplementary material
Source: publisher figshare collection journal article supplement (https://frontiersin.figshare.com/ndownloader/files/39647386)
Supplement: Supplementary file [file 39647386]

## Supplementary Material

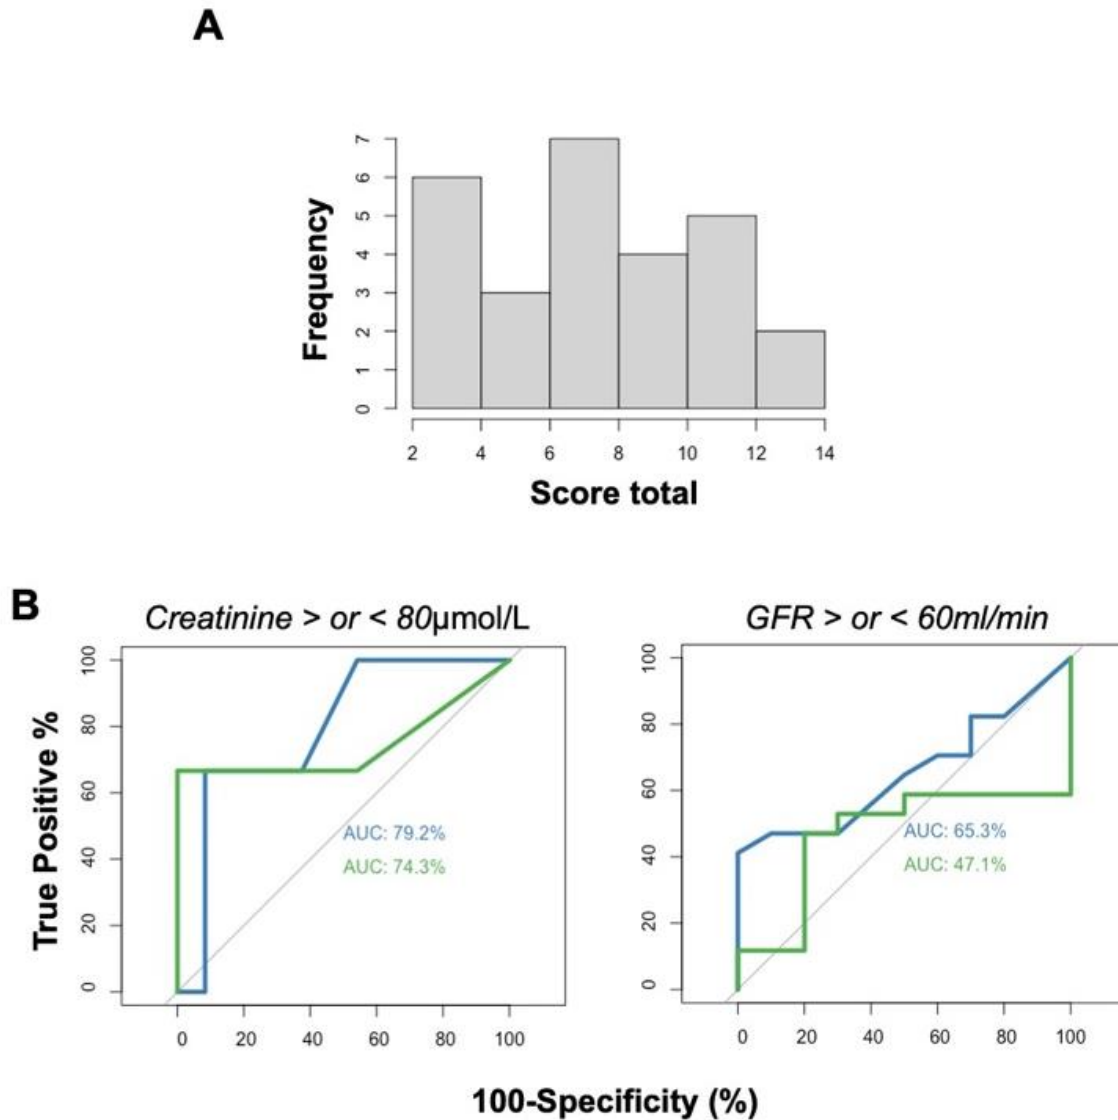

**FIGURE S1. Evaluation of a new RS score.** (A) Score distribution across the patients. (B) ROC curve illustrating the diagnostic ability of a new score to discriminate patients with eGFR above or below 80  $\mu$ mol/L at 1 year. (C) ROC curve illustrating the diagnostic ability of a new score to discriminate patients with eGFR above or below 60 mL/min at 1 year.

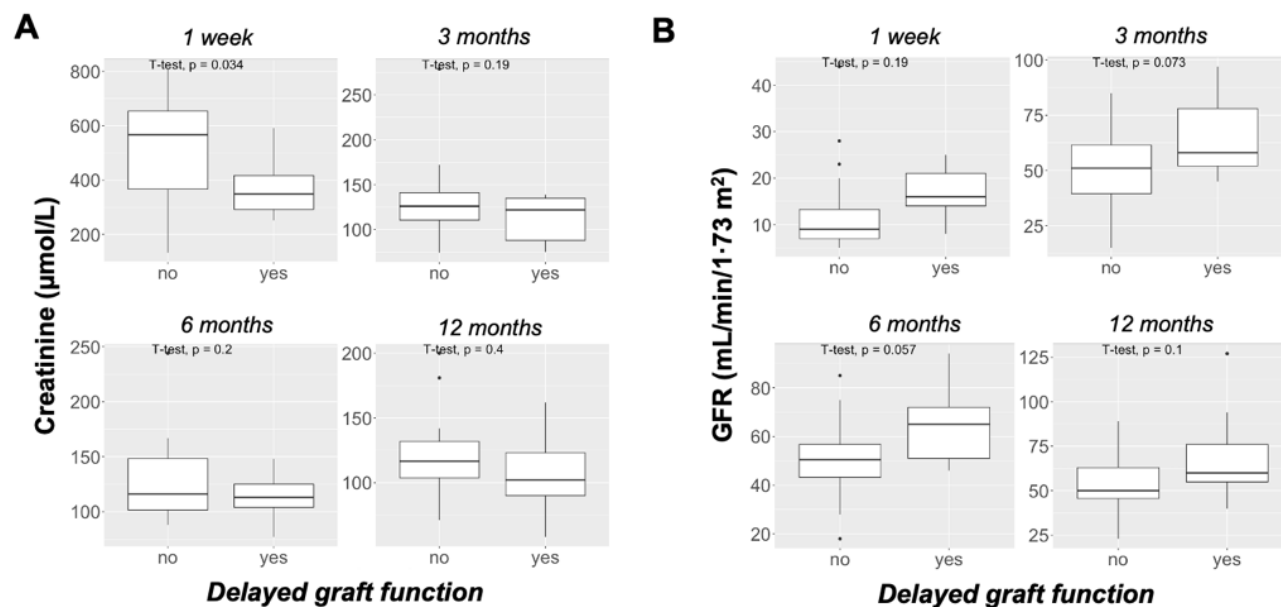

**FIGURE S2.** Serum creatinine level (A) and eGFR (B) at the indicated time as a function of delayed graft function.
